# Supplementary material for: “Left to my own devices, I don’t know”: using theory and patient-reported barriers to move from physical activity recommendations to practice
Source: Springer Nature journal article supplement (doi:10.1007/s00198-018-4390-3), 2018-02-13
Supplement: MOESM1 [file 15461972]

Appendix A

Interview and Focus Group Guide:

**Introduction**

We want to develop tools and resources to help health care providers, patients and community programs implement physical activity recommendations. We have done extensive research and developed exercise recommendations for fall and fracture prevention. We want to get your input on how we can help you use the recommendations.

We will be asking you a series of questions regarding the acceptability and usability of recommendations, barriers and facilitators to implementing recommendations and any gender-specific needs you have identified. The focus group will be audio recorded and transcribed, however you will not be identified. If you would like to say something that you do not want recorded please inform the researcher and we will turn off the audio recording. The focus group will take about 1 hour.

Are there any questions or concerns before we begin?

**1. Assessing current knowledge**

A) Can you give me an example of what you consider a balance exercise?

B) Can you give me an example of what you consider a strength exercise?

C) Can you give me an example of what you consider a back extensor exercise?

**3. Barriers and Facilitators to implementing recommendations on exercise for fall and fracture prevention into practice**

A) Are you currently doing any exercise? Prompt: What and how often?

1. If yes: What motivates you to continue to do exercise that frequently? Prompt: Do you have any advice on how to make exercise a habit?
2. If no: What makes it hard for you to exercise regularly?

B) Are there times when participating in exercise is difficult? Prompt: Why? Prompt: Is there anything that would help you stay motivated (ex/ tools, resources?)

a) How comfortable do you feel doing strength training?

b) Would you feel comfortable doing strength training on your own? Prompt: Why? What makes you feel comfortable? Are there any tools that you have used to help you?

c) How comfortable do you feel doing aerobic exercises?

d) Would you feel comfortable doing aerobic exercises on your own? Prompt: What makes you feel comfortable? Are there any tools that you have used to help you?

e) How comfortable do you feel doing balance exercises?

f) Would you feel comfortable doing balance exercises on your own? Prompt: What makes you feel comfortable? Are there any tools that you have used to help you?

C) Do you or have you ever monitored your exercise? Prompt: What do you measure?

D) What do you want to achieve with exercise?

E) After today’s presentation, what is one key message you took away?

F) How will you change with your exercise habits as a result (of the key take away message)?

**5. Role of Interdisciplinary Team**

A) What do you think about taking advice about exercise from a Physiotherapist or a Kinesiologist?

B) Are you aware of the bonefit program?

a) If yes: Would you be more willing to see a PT or a Kin with bone fit training?

b) If no: {Explain what bone fit training is and then ask whether they would see a bone fit trained PT or Kin}

C) Would you be willing to pay $70 to see a PT or Kin for exercise advice and guidance? Prompt: Why or why not?

D) What do you think of attending a community exercise program 1-2 times per week? Prompt: {Cost, transportation, Instructor certifications}

E) Can you think of a better way to promote community programs?

**5. Brainstorming**

A) Can you think of other ways to get research related to physical activity and exercise out to people who need it?

**Conclusion**

Thank you for participating in our focus group, your participation in this study is appreciated. You may be contacted for a follow-up interview to review the results for agreement. It is anticipated that the results of this research project will be published or presented in a variety of forums. The results will be presented in such a way that you cannot be identified, except with your permission. If you have any further questions or comments please contact Caitlin McArthur
